# Supplementary material for: Reactivity umpolung (reversal) of ligands in transition metal complexes
Source: Royal Society of Chemistry journal article supplement (doi:10.1039/d3cs00979c), 2024-01-01
Supplement: d3cs00979c1.xlsx [file d3cs00979c1.xlsx]

## Sheet: Sheet1
			[M]-L	pKaLAC(H-[M]-L]+)		assumption	AL values from:
nitrile	acceptor a2	amine	cis-Pt(NCR)(PPh3)(Cl)2 5	-3			R. H. Morris, J. Am. Chem. Soc., 2014, 136, 1948–1959
nitrile	acceptor a2	amine	trans-[Pt(Me)(NCR)(PMe2Ph)2]+ 7	1			R. H. Morris, J. Am. Chem. Soc., 2014, 136, 1948–1959
nitrile	acceptor a2	MeOH	Pt(NCMe)(COD)(Me)]+ 8	-11			R. H. Morris, J. Am. Chem. Soc., 2014, 136, 1948–1959
nitrile	acceptor a2	MeOH	[Ni(NCR)(PMe2Ph)2(C6Cl5)]+ 9	-3	<-3	C6Cl5 is <0 (less than LAC(CH3)=2)	J. P. Unsleber, J. Neugebauer and R. H. Morris, Dalton Transactions, 2018, 47, 2739-2747.
nitrile	acceptor a2	amine, MeOH, EtOH	Re(NCR)2(Cl)4 10	-14			R. H. Morris, J. Am. Chem. Soc., 2014, 136, 1948–1959
nitrile	acceptor a2	BH4-	[W(MeCN)(Tp’)(CO)(alkyne)]+ 11	-15			R. H. Morris, Chemical Reviews, 2016, 116, 8588–8654.
nitrile	donor d2	HBF4	trans-ReCl(NCR)(dppe)2 17	12			R. H. Morris, J. Am. Chem. Soc., 2014, 136, 1948–1959
carbonyl	acceptor a1	NaBH(OiPr)3	[Re(CO)2(NO)(C5H5)]+ 24	-6		NO+ is -3	R. H. Morris, Chemical Reviews, 2016, 116, 8588–8654.
carbonyl	acceptor a1	NH2CH2CH2Br	[Mn(CO)2(NO)(C5H5)]+ 26	-8			R. H. Morris, Chemical Reviews, 2016, 116, 8588–8654.
carbonyl	acceptor a1	NH2CH2CH2Br	[Fe(CO)3(C5H5)]+ 27	-25			R. H. Morris, J. Am. Chem. Soc., 2014, 136, 1948–1959
carbonyl	acceptor a1	NH2CH2CH2Br	[Mn(CO)5(NH2Me)]+ 28	-31			R. H. Morris, J. Am. Chem. Soc., 2014, 136, 1948–1959
carbonyl	no reaction	NH2CH2CH2Br	[Fe(CO)2(PPh3)(C5H5)]+ 29	-18			R. H. Morris, J. Am. Chem. Soc., 2014, 136, 1948–1959
carbonyl	donor d2	AlMe3	Cl(PMe2Ph)4Re(CO) 30	4			R. H. Morris, J. Am. Chem. Soc., 2014, 136, 1948–1959
carbonyl	donor d2	TMSOTf	[Fe(SiP3)(CO)]- 32	37	>37	SiAr3- is -5 (greater than LAC(SiCl3)=-12)	R. H. Morris, J. Am. Chem. Soc., 2014, 136, 1948–1959
isonitrile	acceptor a1	NH2R	[Au(CNR)2]+ 35	-13		CNR is 0	R. H. Morris, Chemical Reviews, 2016, 116, 8588–8654.
isonitrile	acceptor a1	OPh-	[IrCp*Cl(CNR)2]+ 37	-16		CNR is 0	R. H. Morris, Chemical Reviews, 2016, 116, 8588–8654.
isonitrile	donor d2	HBF4	Mo(CNR)2(dppe)2 39 M = Mo	12		CNR is 0	R. H. Morris, Chemical Reviews, 2016, 116, 8588–8654.
isonitrile	donor d2	HBF4	W(CNR)2(dppe)2 39 M = W	14		CNR is 0	R. H. Morris, Chemical Reviews, 2016, 116, 8588–8654.
isonitrile	donor d2	HBF4	ReCl(CNR)(dppe)2 40	8		CNR is 0	R. H. Morris, Chemical Reviews, 2016, 116, 8588–8654.
dinitrogen	acceptor a1?	MeLi	Mn(N2)(C5H5)(CO)2 43	-8		N2 is -2	R. H. Morris, Chemical Reviews, 2016, 116, 8588–8654.
carbonyl	acceptor a1	PhLi	Mn(N2)(C5H5)(CO)2 43	-8		N2 is -2	R. H. Morris, Chemical Reviews, 2016, 116, 8588–8654.
dinitrogen	donor d2	AlMe3	trans-Mo(N2)2(dppe)2 47	8		N2 is -2	R. H. Morris, Chemical Reviews, 2016, 116, 8588–8654.
dinitrogen	donor d2	AlMe3	trans-W(N2)2(dppe)2 49	10		N2 is -2	R. H. Morris, Chemical Reviews, 2016, 116, 8588–8654.
dinitrogen	donor d2	AlMe3	trans-ReCl(N2)(PMe2Ph)4 48	10		N2 is -2	R. H. Morris, Chemical Reviews, 2016, 116, 8588–8654.
dinitrogen	donor d2	AlMe3	trans-ReCl(N2)(PMe2Ph)2(P(OMe)3)2 50	6		N2 is -2	R. H. Morris, Chemical Reviews, 2016, 116, 8588–8654.
dinitrogen	donor d2	AlMe3	Os(N2)(Cl)2(PEt2Ph)3 51	0		N2 is -2	R. H. Morris, Chemical Reviews, 2016, 116, 8588–8654.
dinitrogen	donor d2	HBArF	Mo(N2)(N(CH2CH2NAr)2(CH2CH2NHAr)] ? 54	8		N2 is -2, CH2NAr is 1	J. P. Unsleber, J. Neugebauer and R. H. Morris, Dalton Transactions, 2018, 47, 2739-2747.
dinitrogen	donor d2	H+, ClSiR3	[Cr(N2)(C5Me5)(PEt2CH2CH2PEt2)]- 54	41		N2 is -2	R. H. Morris, Chemical Reviews, 2016, 116, 8588–8654.
dinitrogen	donor d2	ClSiR3	[Cr(Cp*)(NHC)(N2)2]- 56	35		N2 is -2, NHC is 6	M. M. H. Sung, S. Jdanova and R. H. Morris, J. Organometal. Chem., 2019, 880, 15-21.
dinitrogen	donor d2	ClSiR3	[Fe(BP3)(N2)]- 57	40		BR3 is 0	R. H. Morris, Chemical Reviews, 2016, 116, 8588–8654.
olefin	donor d1	strong acid	Mo(C2H4)2(PPh2CH2CH2PPh2)2 75Mo	8			R. H. Morris, J. Am. Chem. Soc., 2014, 136, 1948–1959
olefin	donor d1	strong acid	W(C2H4)2(PPh2CH2CH2PPh2)2 75W	10			R. H. Morris, J. Am. Chem. Soc., 2014, 136, 1948–1959
olefin	donor d1	strong acid	W(h2-benzene)(PMe3)(NO)(Tp) 79	2		eta-2-benzene is -2 (olefin)	R. H. Morris, Chemical Reviews, 2016, 116, 8588–8654.
olefin	donor d1	HOTf	[Os(h2-xylenium)(NH3)5]2+ 80	5		eta-2-benzene is -2 (olefin)	R. H. Morris, Chemical Reviews, 2016, 116, 8588–8654.
eta-6-arene	donor d1	HBF4	Mo(C6H6)((PPh2CH2)3CMe) 3	3		3 olefins	R. H. Morris, J. Am. Chem. Soc., 2014, 136, 1948–1959
eta-6-arene	acceptor a1	carbanion	Mo(C6H6)(CO)3 1	-18		3 olefins	R. H. Morris, J. Am. Chem. Soc., 2014, 136, 1948–1959
eta-6-arene	acceptor a1	carbanion	Cr(C6H6)(CO)3 87	-18		3 olefins	R. H. Morris, J. Am. Chem. Soc., 2014, 136, 1948–1959
eta-6-arene	acceptor a1	carbanion	[Mn(C6H6)(CO)3]+ 86	-33		3 olefins	R. H. Morris, J. Am. Chem. Soc., 2014, 136, 1948–1959
olefin	acceptor a1	H2O	[Pt(C2H4)(P-py-P)]2+ 82	-20		PNP is 3+4+3=10	R. H. Morris, J. Am. Chem. Soc., 2014, 136, 1948–1959
